# Supplementary material for: Individual bat virome analysis reveals co-infection and spillover among bats and virus zoonotic potential
Source: PubMed Central journal article supplement (PMC10333379; doi:10.1038/s41467-023-39835-1), 2023-07-10
Supplement: 41467_2023_39835_MOESM1_ESM.pdf [file 41467_2023_39835_MOESM1_ESM.pdf]

1 **Supplementary Information for**

2 “Individual bat viromes reveal the co-infection, spillover and  
3 emergence risk of potential zoonotic viruses”

4

5 **Supplementary Figures**

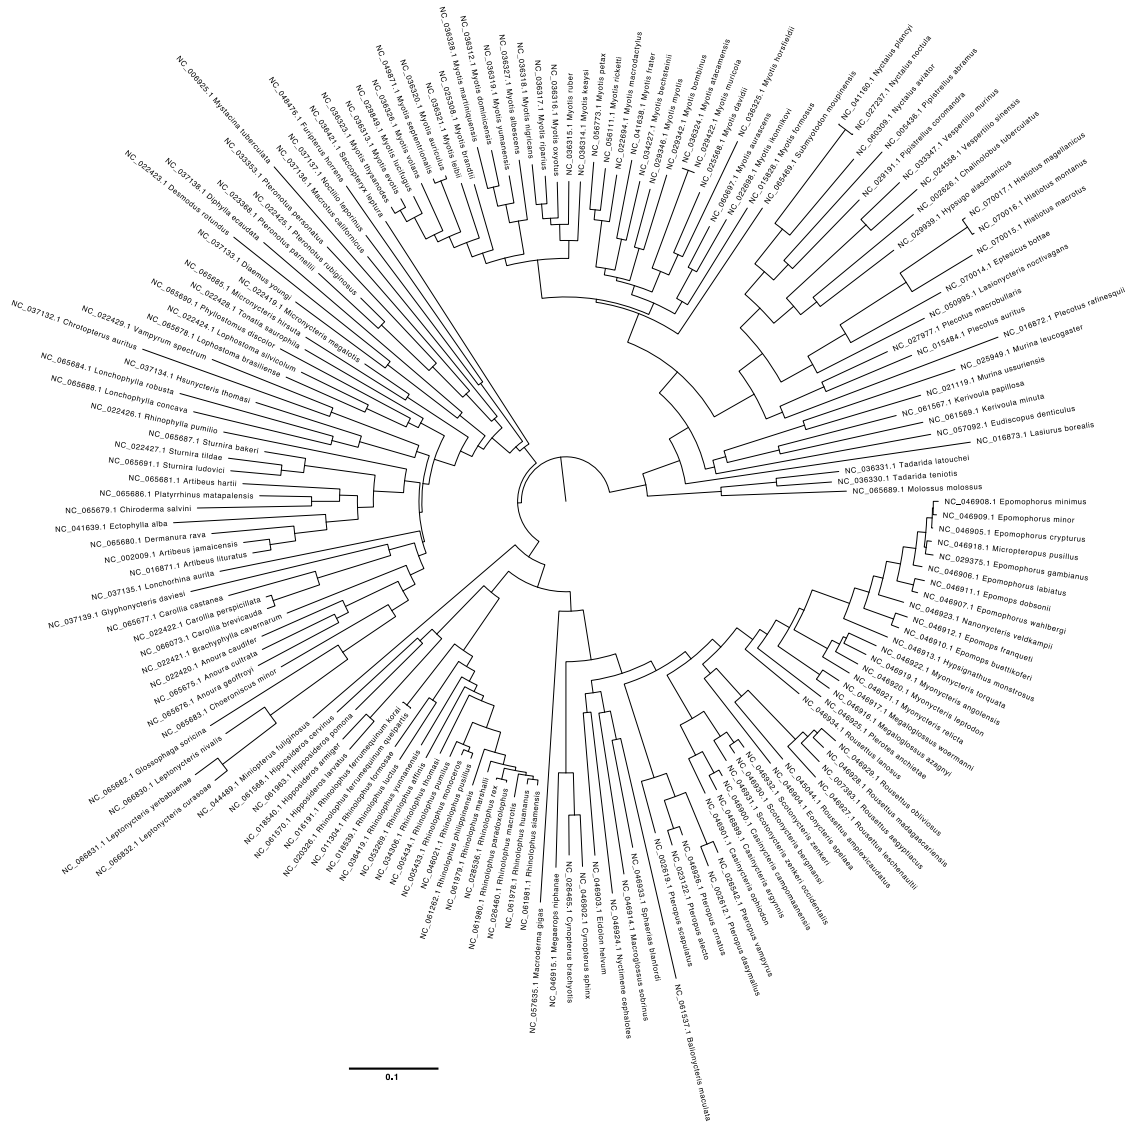

6

7

8 **Supplementary Fig. 1 | The Phylogenetic tree of bats.** This tree includes all the reference  
9 COI sequence from NCBI. The tree was estimated using nucleotide sequences of bat COI  
10 gene utilising a maximum likelihood (ML) method.

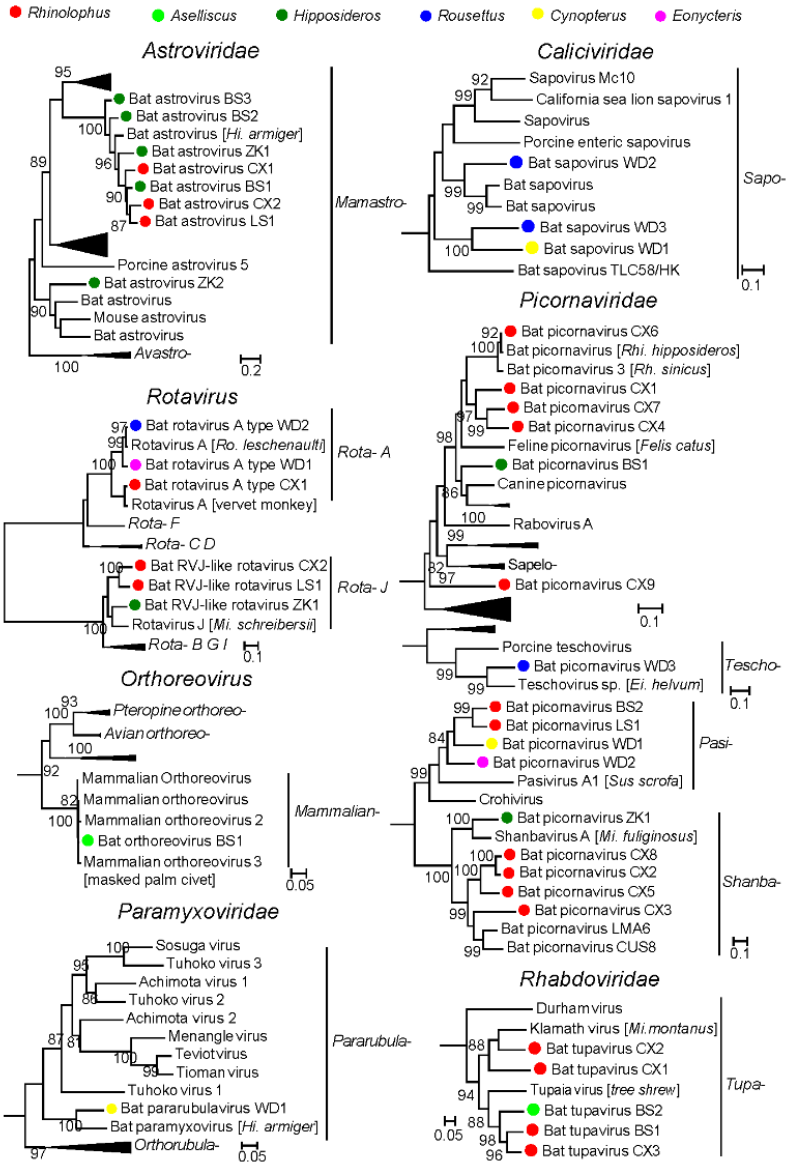

11

12 **Supplementary Fig. 2 | The evolutionary relationships of the RNA viruses identified in**  
 13 **this study.** The phylogenetic trees were estimated using a maximum likelihood method based  
 14 on the RdRp protein. All trees were midpoint-rooted and the branch length indicates number of  
 15 nucleotide substitutions per site. For clarity, only support values >80% are shown. Dots  
 16 indicate viruses detected in our samples and colors represent host genus.

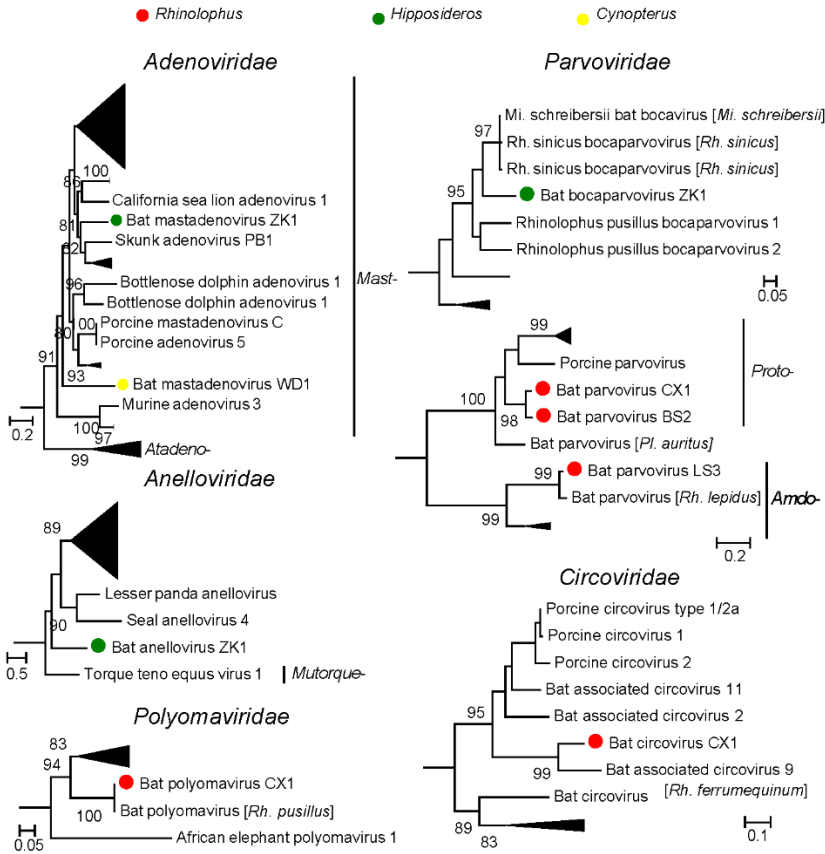

17

18 **Supplementary Fig. 3 | The evolutionary relationships of the DNA viruses identified in**  
 19 **this study.** These phylogenetic trees were estimated using a maximum likelihood method  
 20 based on DNA pol or LTA<sub>g</sub> (*Polyomaviridae*), ORF1 (*Anelloviridae*), and NS1 (*Parvoviridae*)  
 21 protein. All trees were midpoint-rooted, and the branch length indicates number of nucleotide  
 22 substitutions per site. For clarity, only support values >80% were shown. Dots indicate viruses  
 23 detected in our samples, and colors represent host genus.

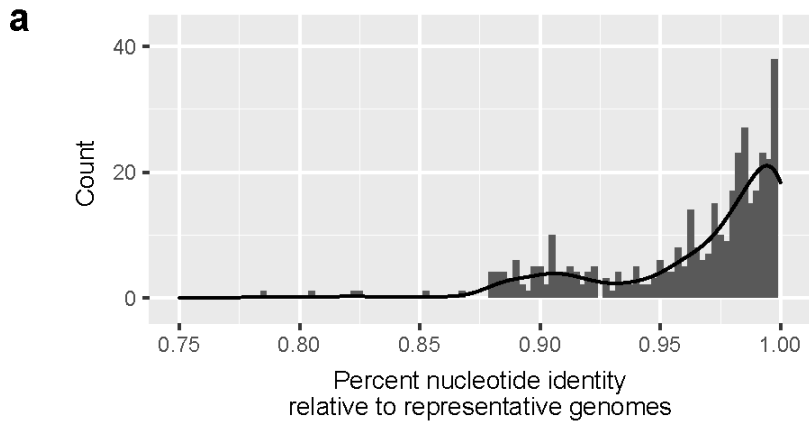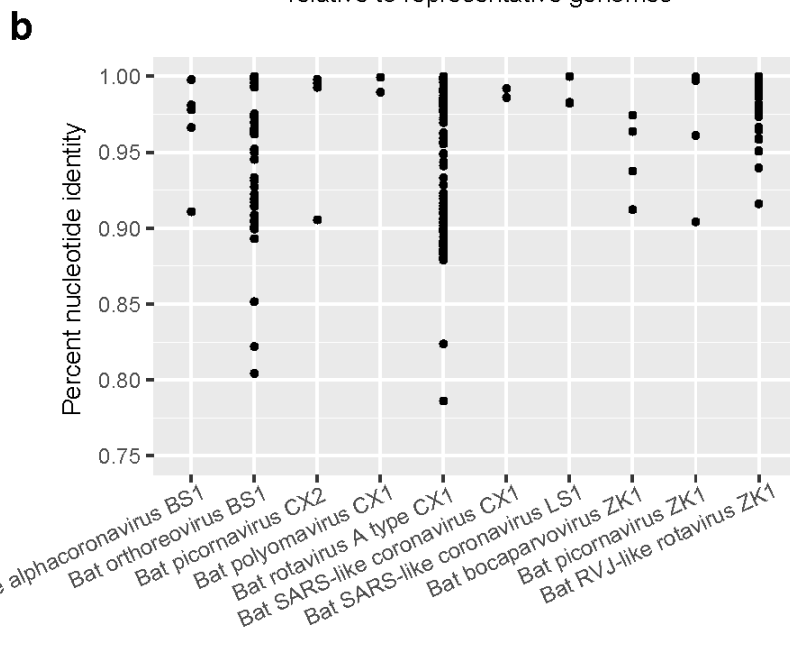

24

25 **Supplementary Fig. 4 | The whole-genome nucleotide identity of viral strains versus the**  
 26 **corresponding representative genomes. (A)** Histogram of percentage genome identity to  
 27 representative genomes. All viral species and all strains were shown. **(B)** Percentage genome  
 28 identity to representative genomes. This plot displayed the 10 viral species that were detected  
 29 among different bat species (cross-species transmission).

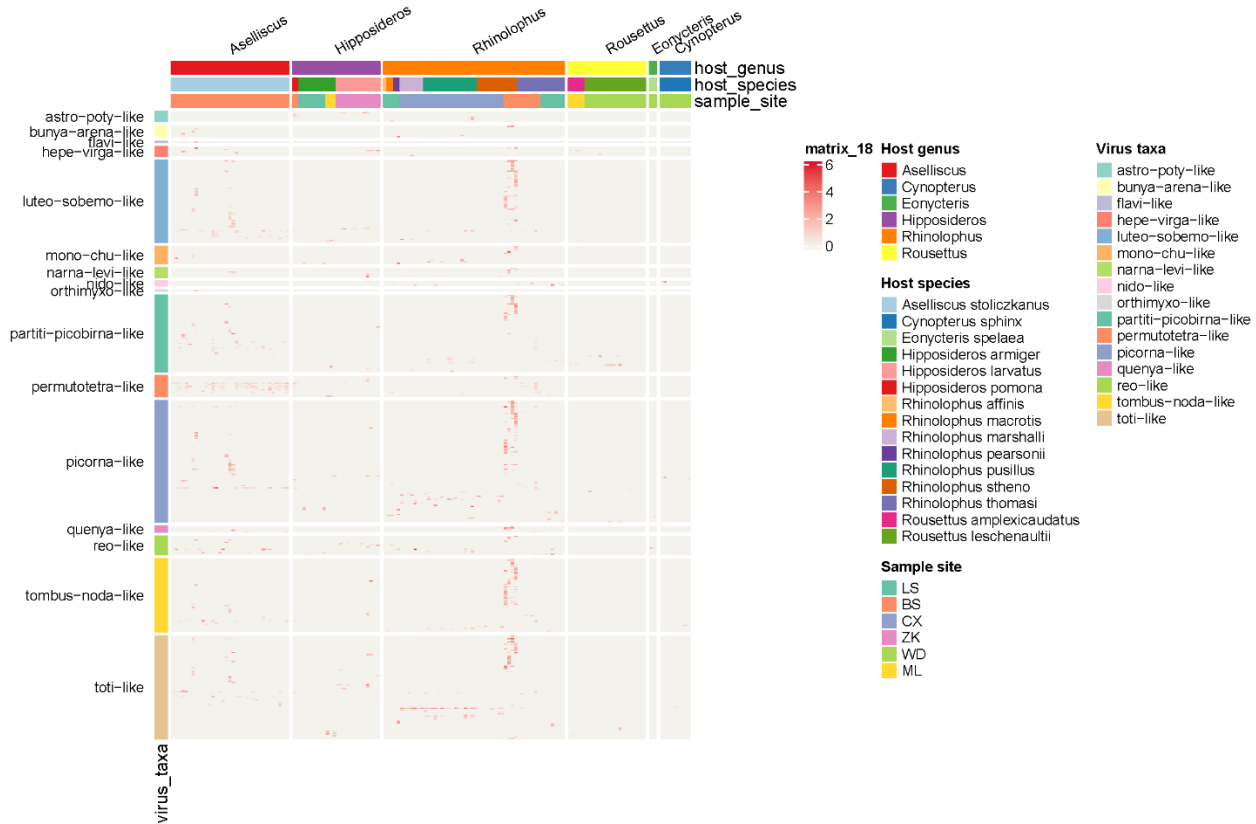

30

31 **Supplementary Fig. 5 | Characterization of the total RNA virome of bats.** The heatmap  
 32 displays the distribution and abundance of total RNA viruses in individual bats. Each column  
 33 represents an individual bat, while each row represents a virus species. The abundance of  
 34 viruses in each individual is represented as a logarithm of the number of mapped reads per  
 35 million total reads (RPM). Sampling site, host taxonomy (species and genus) and virus  
 36 taxonomy are shown as coloured strips at top and left, respectively.

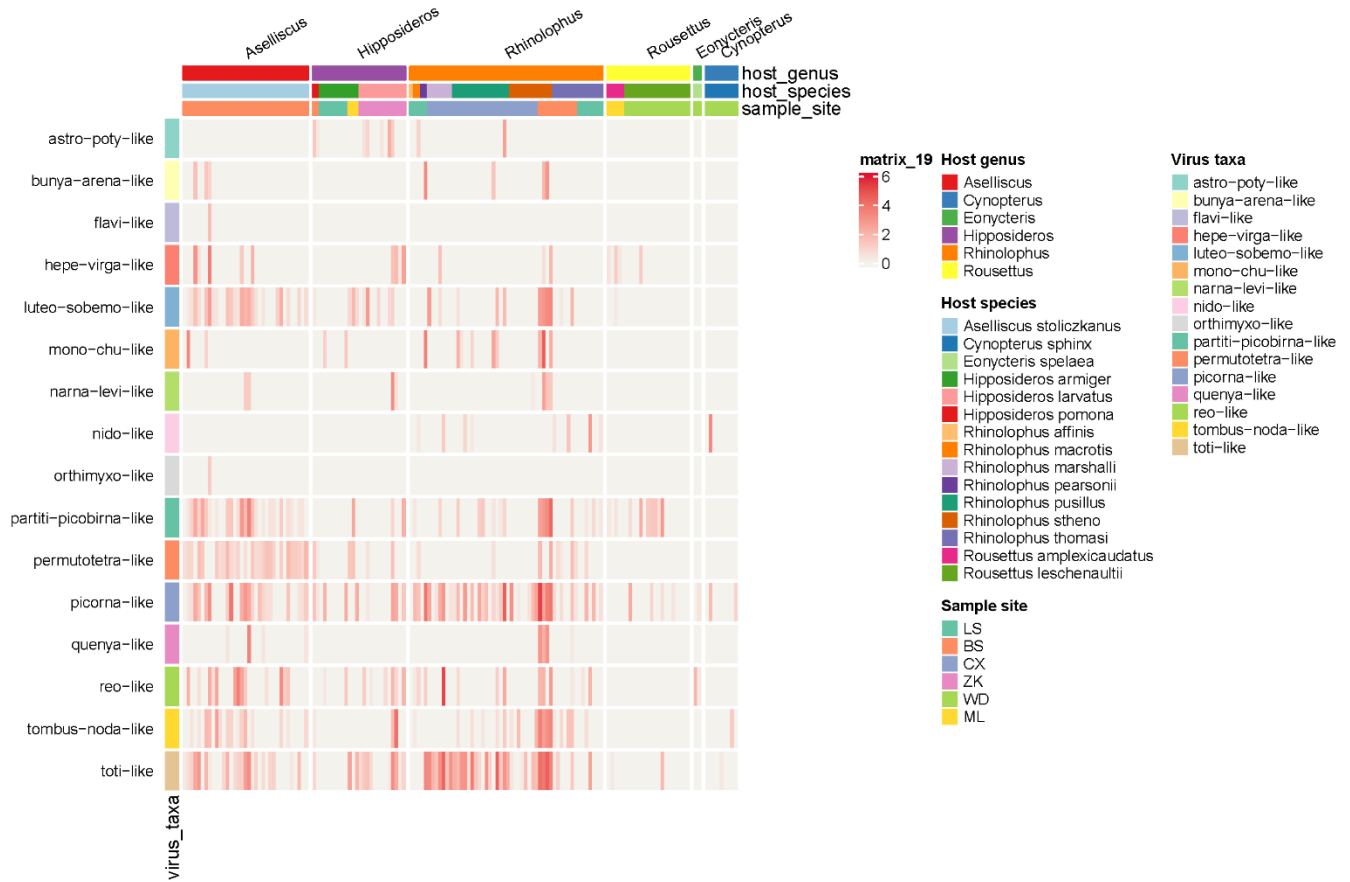

37

38 **Supplementary Fig. 6 | Characterization of the total RNA virome of bats.** In this figure,  
 39 viruses are collapsed by order, i.e., each row represents a viral order.

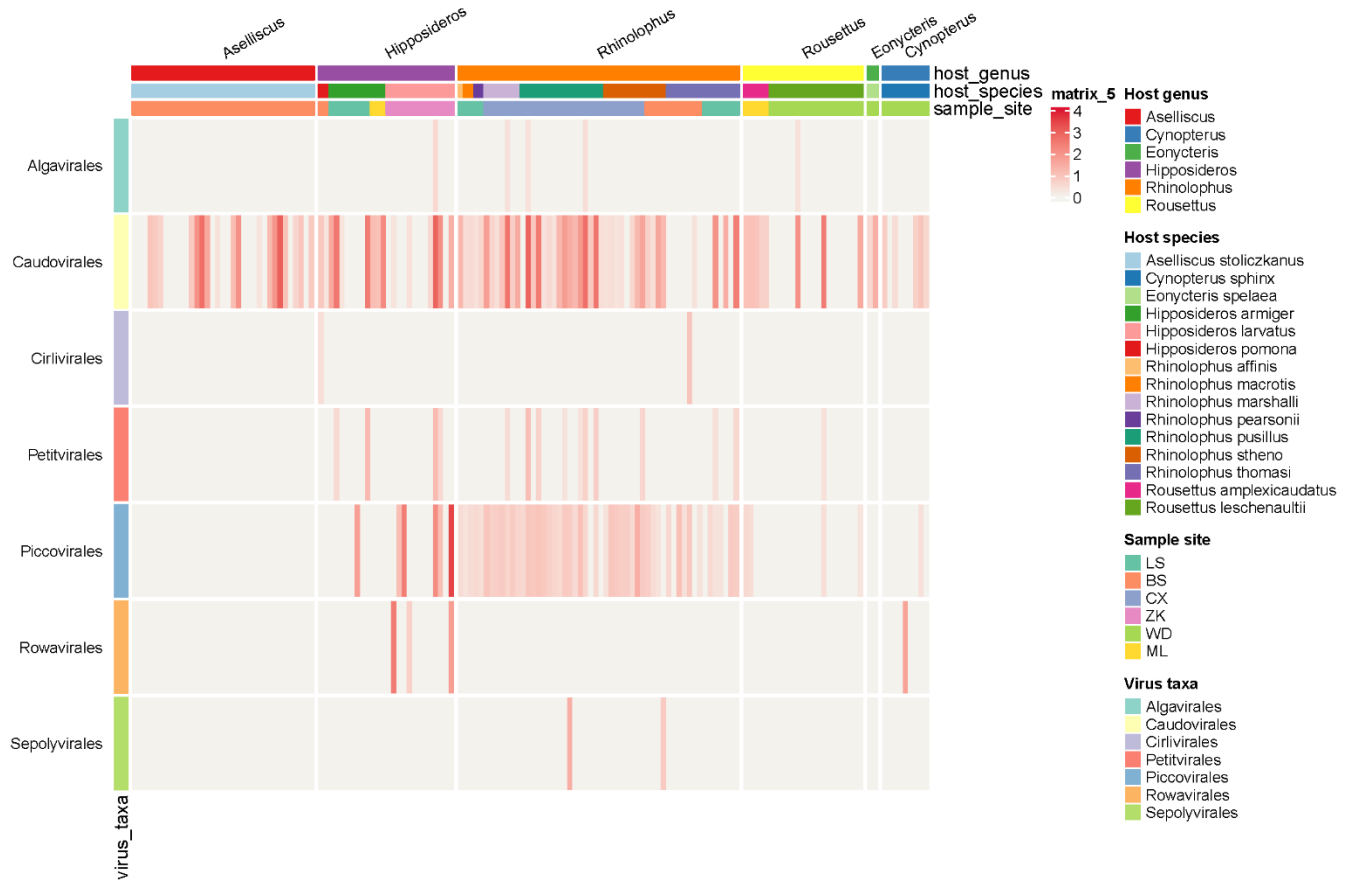

40

41 **Supplementary Fig. 7 | Characterization of the total DNA virome of bats.** In this figure,  
 42 viruses are collapsed by order, i.e., each row represents a viral order.

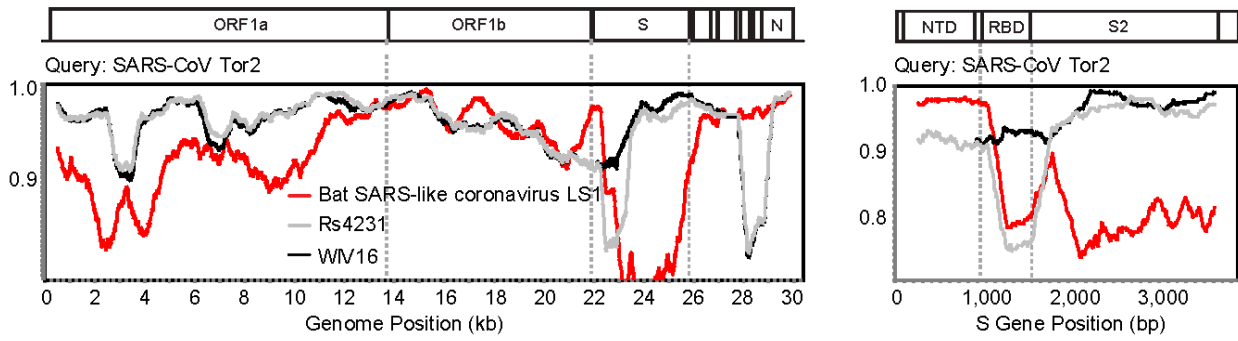

43

44

45

**Supplementary Fig. 8 | Recombination analysis of SARS-related coronaviruses at the whole genome and spike protein scales.**



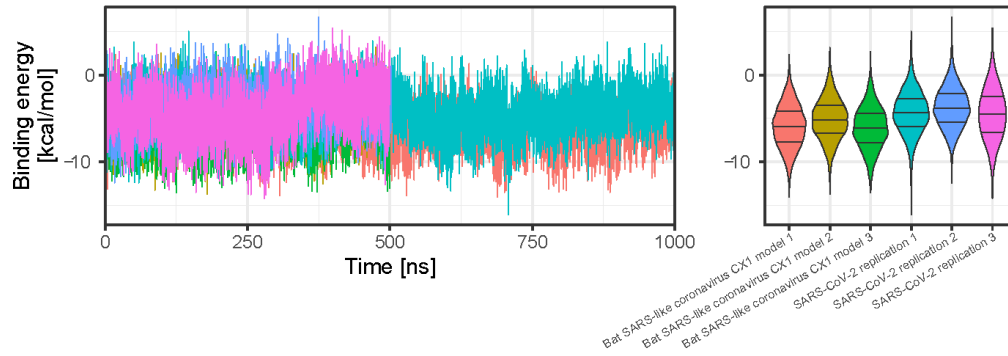

46

47 **Supplementary Fig. 9 | The predicted binding energy of the RBD-hACE2 complex in the**  
 48 **duration of MD simulations.** Two 1000-ns-long main simulations and four 500-ns-long  
 49 replications were performed. These results showed that Bat SARS-like coronavirus CX1 RBD  
 50 can consistently bind to hACE2, although the binding energy is slightly lower than human  
 51 SARS-CoV-2, suggesting higher affinity.

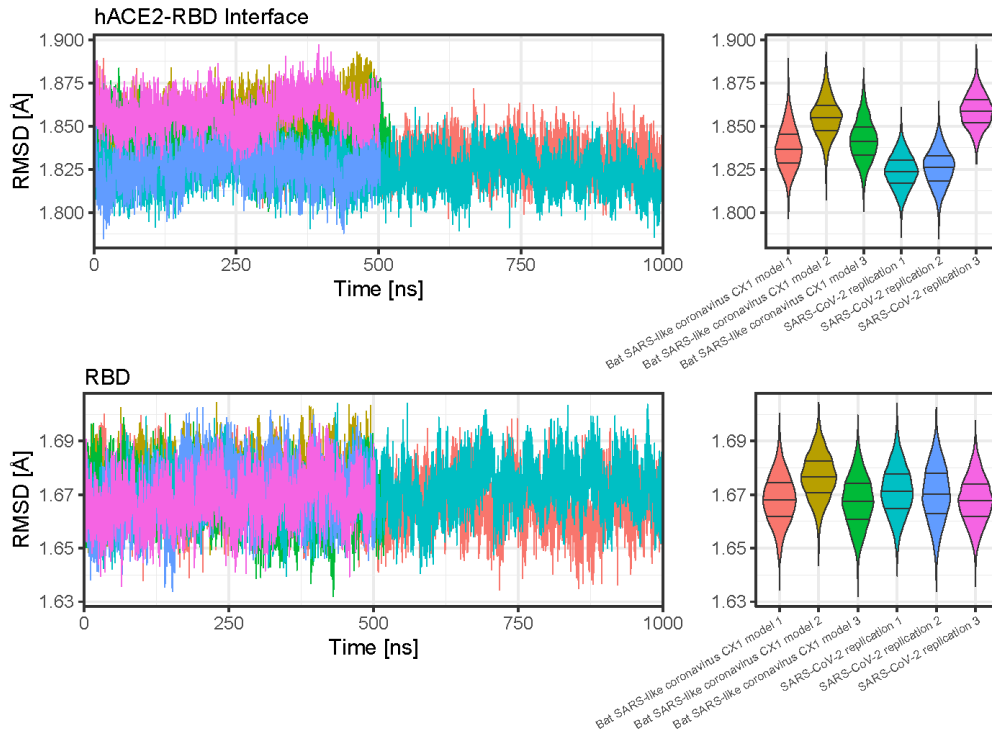

52  
53  
54  
55  
56  
57

**Supplementary Fig. 10 | The deviation in protein backbone position during the MD simulations.** RMSD is the abbreviation of root-mean-square deviation of atomic positions. We used backbone (C, N and O atoms in the main chain) RMSD to reflect the stability of RBD-hACE2 binding. Bat SARS-like coronavirus CX1 displayed similar binding stability with human SARS-CoV-2, regarding the RBD and RBD-hACE2 interface.

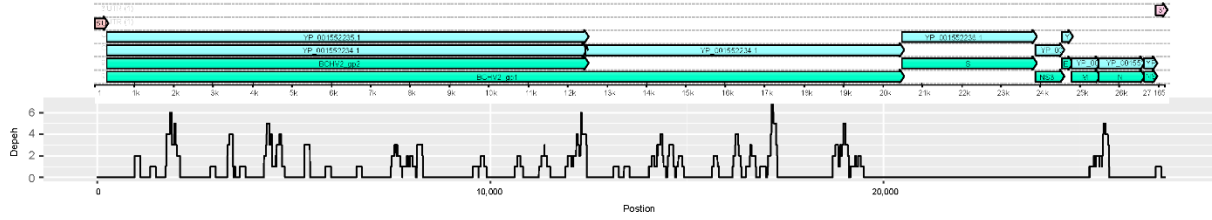

58

59 **Supplementary Fig. 11 | The genome coverage of HKU2-like LS1 from the library of**  
 60 **S18LSBatR79.** The reference genome was Rhinolophus bat coronavirus HKU2  
 61 (NC\_009988.1).

62

**Supplementary Tables**

63

**Supplementary Table 1.** Details of the 149 bats samples and reads counts of corresponding meta-transcriptomic sequencing libraries.

64

| lib_id      | species                        | genus             | family         | year | Sample site | clean_reads | norRNA_reads |
|-------------|--------------------------------|-------------------|----------------|------|-------------|-------------|--------------|
| S17BSBatR15 | <i>Aselliscus stoliczkanus</i> | <i>Aselliscus</i> | Hipposideridae | 2017 | BS          | 68880512    | 44506938     |
| S17BSBatR16 | <i>Aselliscus stoliczkanus</i> | <i>Aselliscus</i> | Hipposideridae | 2017 | BS          | 75999644    | 34192819     |
| S17BSBatR48 | <i>Aselliscus stoliczkanus</i> | <i>Aselliscus</i> | Hipposideridae | 2017 | BS          | 71871898    | 33072042     |
| S17BSBatR06 | <i>Aselliscus stoliczkanus</i> | <i>Aselliscus</i> | Hipposideridae | 2017 | BS          | 74929166    | 27267536     |
| S17BSBatR07 | <i>Aselliscus stoliczkanus</i> | <i>Aselliscus</i> | Hipposideridae | 2017 | BS          | 96947200    | 34805448     |
| S17BSBatR08 | <i>Aselliscus stoliczkanus</i> | <i>Aselliscus</i> | Hipposideridae | 2017 | BS          | 91702380    | 51779185     |
| S15BSBatR02 | <i>Aselliscus stoliczkanus</i> | <i>Aselliscus</i> | Hipposideridae | 2015 | BS          | 70860150    | 54619603     |
| S15BSBatR03 | <i>Aselliscus stoliczkanus</i> | <i>Aselliscus</i> | Hipposideridae | 2015 | BS          | 72453364    | 50879141     |
| S17BSBatR41 | <i>Aselliscus stoliczkanus</i> | <i>Aselliscus</i> | Hipposideridae | 2017 | BS          | 80656886    | 59747842     |
| S17BSBatR42 | <i>Aselliscus stoliczkanus</i> | <i>Aselliscus</i> | Hipposideridae | 2017 | BS          | 66525248    | 26985400     |
| S17BSBatR43 | <i>Aselliscus stoliczkanus</i> | <i>Aselliscus</i> | Hipposideridae | 2017 | BS          | 93421078    | 70656412     |
| S17BSBatR44 | <i>Aselliscus stoliczkanus</i> | <i>Aselliscus</i> | Hipposideridae | 2017 | BS          | 69262522    | 28294702     |
| S17BSBatR45 | <i>Aselliscus stoliczkanus</i> | <i>Aselliscus</i> | Hipposideridae | 2017 | BS          | 90277278    | 18371471     |
| S17BSBatR46 | <i>Aselliscus stoliczkanus</i> | <i>Aselliscus</i> | Hipposideridae | 2017 | BS          | 65986080    | 19538297     |
| S17BSBatR47 | <i>Aselliscus stoliczkanus</i> | <i>Aselliscus</i> | Hipposideridae | 2017 | BS          | 84954490    | 33231584     |
| S17BSBatR49 | <i>Aselliscus stoliczkanus</i> | <i>Aselliscus</i> | Hipposideridae | 2017 | BS          | 93813908    | 44028166     |
| S15BSBatR07 | <i>Aselliscus stoliczkanus</i> | <i>Aselliscus</i> | Hipposideridae | 2015 | BS          | 75906002    | 41793266     |
| S15BSBatR08 | <i>Aselliscus stoliczkanus</i> | <i>Aselliscus</i> | Hipposideridae | 2015 | BS          | 85418074    | 62171363     |
| S15BSBatR09 | <i>Aselliscus stoliczkanus</i> | <i>Aselliscus</i> | Hipposideridae | 2015 | BS          | 81566458    | 58015712     |
| S17BSBatR17 | <i>Aselliscus stoliczkanus</i> | <i>Aselliscus</i> | Hipposideridae | 2017 | BS          | 82798246    | 28358352     |
| S17BSBatR18 | <i>Aselliscus stoliczkanus</i> | <i>Aselliscus</i> | Hipposideridae | 2017 | BS          | 68499666    | 41435388     |
| S17BSBatR19 | <i>Aselliscus stoliczkanus</i> | <i>Aselliscus</i> | Hipposideridae | 2017 | BS          | 86115436    | 46209043     |
| S17BSBatR20 | <i>Aselliscus stoliczkanus</i> | <i>Aselliscus</i> | Hipposideridae | 2017 | BS          | 93076172    | 48944765     |
| S17BSBatR04 | <i>Aselliscus stoliczkanus</i> | <i>Aselliscus</i> | Hipposideridae | 2017 | BS          | 75987416    | 50810480     |
| S17BSBatR31 | <i>Aselliscus stoliczkanus</i> | <i>Aselliscus</i> | Hipposideridae | 2017 | BS          | 96054938    | 47400247     |
| S17BSBatR33 | <i>Aselliscus stoliczkanus</i> | <i>Aselliscus</i> | Hipposideridae | 2017 | BS          | 71969046    | 20304203     |
| S17BSBatR34 | <i>Aselliscus stoliczkanus</i> | <i>Aselliscus</i> | Hipposideridae | 2017 | BS          | 67853898    | 50560539     |
| S17BSBatR35 | <i>Aselliscus stoliczkanus</i> | <i>Aselliscus</i> | Hipposideridae | 2017 | BS          | 78930206    | 60628177     |
| S17BSBatR36 | <i>Aselliscus stoliczkanus</i> | <i>Aselliscus</i> | Hipposideridae | 2017 | BS          | 71511338    | 54127554     |
| S17BSBatR37 | <i>Aselliscus stoliczkanus</i> | <i>Aselliscus</i> | Hipposideridae | 2017 | BS          | 81524164    | 42966608     |
| S17BSBatR38 | <i>Aselliscus stoliczkanus</i> | <i>Aselliscus</i> | Hipposideridae | 2017 | BS          | 88633424    | 51078488     |
| S17BSBatR39 | <i>Aselliscus stoliczkanus</i> | <i>Aselliscus</i> | Hipposideridae | 2017 | BS          | 84276296    | 53346626     |
| S17BSBatR50 | <i>Aselliscus stoliczkanus</i> | <i>Aselliscus</i> | Hipposideridae | 2017 | BS          | 73817862    | 35687375     |
| S17BSBatR09 | <i>Aselliscus stoliczkanus</i> | <i>Aselliscus</i> | Hipposideridae | 2017 | BS          | 67861376    | 36100117     |
| S17BSBatR10 | <i>Aselliscus stoliczkanus</i> | <i>Aselliscus</i> | Hipposideridae | 2017 | BS          | 70281582    | 41017175     |
| S17WDBatR05 | <i>Cynopterus sphinx</i>       | <i>Cynopterus</i> | Pteropodidae   | 2017 | WD          | 73614966    | 56763613     |
| S16WDBatR58 | <i>Cynopterus sphinx</i>       | <i>Cynopterus</i> | Pteropodidae   | 2016 | WD          | 68808808    | 38117763     |

|             |                              |                     |                |      |    |          |          |
|-------------|------------------------------|---------------------|----------------|------|----|----------|----------|
| S17WDBatR04 | <i>Cynopterus sphinx</i>     | <i>Cynopterus</i>   | Pteropodidae   | 2017 | WD | 67191458 | 42223044 |
| S17WDBatR08 | <i>Cynopterus sphinx</i>     | <i>Cynopterus</i>   | Pteropodidae   | 2017 | WD | 67293178 | 26546783 |
| S17WDBatR03 | <i>Cynopterus sphinx</i>     | <i>Cynopterus</i>   | Pteropodidae   | 2017 | WD | 67958666 | 41309320 |
| S18WDBatR01 | <i>Cynopterus sphinx</i>     | <i>Cynopterus</i>   | Pteropodidae   | 2018 | WD | 83891592 | 44088306 |
| S17WDBatR06 | <i>Cynopterus sphinx</i>     | <i>Cynopterus</i>   | Pteropodidae   | 2017 | WD | 70939608 | 35259402 |
| S17WDBatR09 | <i>Cynopterus sphinx</i>     | <i>Cynopterus</i>   | Pteropodidae   | 2017 | WD | 68646994 | 32378944 |
| S16WDBatR60 | <i>Cynopterus sphinx</i>     | <i>Cynopterus</i>   | Pteropodidae   | 2016 | WD | 67517154 | 38318585 |
| S16WDBatR61 | <i>Eonycteris spelaea</i>    | <i>Eonycteris</i>   | Pteropodidae   | 2016 | WD | 75078882 | 32106839 |
| S18WDBatR02 | <i>Eonycteris spelaea</i>    | <i>Eonycteris</i>   | Pteropodidae   | 2018 | WD | 74989214 | 30481633 |
| S17BSBatR05 | <i>Hipposideros pomona</i>   | <i>Hipposideros</i> | Hipposideridae | 2017 | BS | 71509188 | 15704666 |
| S17BSBatR03 | <i>Hipposideros pomona</i>   | <i>Hipposideros</i> | Hipposideridae | 2017 | BS | 68499306 | 34969863 |
| S18LSBatR57 | <i>Hipposideros armiger</i>  | <i>Hipposideros</i> | Hipposideridae | 2018 | LS | 65950060 | 47658214 |
| S18LSBatR58 | <i>Hipposideros armiger</i>  | <i>Hipposideros</i> | Hipposideridae | 2018 | LS | 68459604 | 56279452 |
| S18LSBatR53 | <i>Hipposideros armiger</i>  | <i>Hipposideros</i> | Hipposideridae | 2018 | LS | 67177820 | 48054491 |
| S18LSBatR54 | <i>Hipposideros armiger</i>  | <i>Hipposideros</i> | Hipposideridae | 2018 | LS | 68770812 | 38631306 |
| S18LSBatR55 | <i>Hipposideros armiger</i>  | <i>Hipposideros</i> | Hipposideridae | 2018 | LS | 71462950 | 34852173 |
| S18LSBatR56 | <i>Hipposideros armiger</i>  | <i>Hipposideros</i> | Hipposideridae | 2018 | LS | 67251454 | 51315508 |
| S18LSBatR60 | <i>Hipposideros armiger</i>  | <i>Hipposideros</i> | Hipposideridae | 2018 | LS | 71576454 | 53220809 |
| S18LSBatR59 | <i>Hipposideros armiger</i>  | <i>Hipposideros</i> | Hipposideridae | 2018 | LS | 69240450 | 55171410 |
| S19MLBatR10 | <i>Hipposideros armiger</i>  | <i>Hipposideros</i> | Hipposideridae | 2019 | ML | 76686836 | 49786405 |
| S19MLBatR09 | <i>Hipposideros armiger</i>  | <i>Hipposideros</i> | Hipposideridae | 2019 | ML | 78112840 | 29749427 |
| S19MLBatR11 | <i>Hipposideros armiger</i>  | <i>Hipposideros</i> | Hipposideridae | 2019 | ML | 66418404 | 31525709 |
| S15ZKBatR23 | <i>Hipposideros larvatus</i> | <i>Hipposideros</i> | Hipposideridae | 2015 | ZK | 67487566 | 54870198 |
| S15ZKBatR21 | <i>Hipposideros larvatus</i> | <i>Hipposideros</i> | Hipposideridae | 2015 | ZK | 83156356 | 59230411 |
| S15ZKBatR22 | <i>Hipposideros larvatus</i> | <i>Hipposideros</i> | Hipposideridae | 2015 | ZK | 70537570 | 61027468 |
| S15ZKBatR24 | <i>Hipposideros larvatus</i> | <i>Hipposideros</i> | Hipposideridae | 2015 | ZK | 77064058 | 59641649 |
| S15ZKBatR25 | <i>Hipposideros larvatus</i> | <i>Hipposideros</i> | Hipposideridae | 2015 | ZK | 70955122 | 63091112 |
| S15ZKBatR26 | <i>Hipposideros larvatus</i> | <i>Hipposideros</i> | Hipposideridae | 2015 | ZK | 71540842 | 60869301 |
| S15ZKBatR27 | <i>Hipposideros larvatus</i> | <i>Hipposideros</i> | Hipposideridae | 2015 | ZK | 75954134 | 63685002 |
| S15ZKBatR28 | <i>Hipposideros larvatus</i> | <i>Hipposideros</i> | Hipposideridae | 2015 | ZK | 77997366 | 61943057 |
| S15ZKBatR29 | <i>Hipposideros larvatus</i> | <i>Hipposideros</i> | Hipposideridae | 2015 | ZK | 99891834 | 72052070 |
| S15ZKBatR30 | <i>Hipposideros larvatus</i> | <i>Hipposideros</i> | Hipposideridae | 2015 | ZK | 74775210 | 35351897 |
| S15ZKBatR11 | <i>Hipposideros larvatus</i> | <i>Hipposideros</i> | Hipposideridae | 2015 | ZK | 72762514 | 12105852 |
| S15ZKBatR12 | <i>Hipposideros larvatus</i> | <i>Hipposideros</i> | Hipposideridae | 2015 | ZK | 66829092 | 58012754 |
| S15ZKBatR13 | <i>Hipposideros larvatus</i> | <i>Hipposideros</i> | Hipposideridae | 2015 | ZK | 54362176 | 34078817 |
| S18LSBatR81 | <i>Rhinolophus affinis</i>   | <i>Rhinolophus</i>  | Rhinolophidae  | 2018 | LS | 49475970 | 20705771 |
| S18LSBatR74 | <i>Rhinolophus macrotis</i>  | <i>Rhinolophus</i>  | Rhinolophidae  | 2018 | LS | 60060528 | 24057082 |
| S18LSBatR73 | <i>Rhinolophus macrotis</i>  | <i>Rhinolophus</i>  | Rhinolophidae  | 2018 | LS | 55214320 | 15962511 |
| S18LSBatR76 | <i>Rhinolophus pearsonii</i> | <i>Rhinolophus</i>  | Rhinolophidae  | 2018 | LS | 58997270 | 12254475 |
| S18LSBatR78 | <i>Rhinolophus pearsonii</i> | <i>Rhinolophus</i>  | Rhinolophidae  | 2018 | LS | 49224150 | 7420822  |
| S18CXBatR07 | <i>Rhinolophus marshalli</i> | <i>Rhinolophus</i>  | Rhinolophidae  | 2018 | CX | 69621878 | 11273318 |
| S18CXBatR19 | <i>Rhinolophus marshalli</i> | <i>Rhinolophus</i>  | Rhinolophidae  | 2018 | CX | 1.14E+08 | 96844036 |

|               |                              |                    |               |      |    |          |          |
|---------------|------------------------------|--------------------|---------------|------|----|----------|----------|
| S18CXBatR04   | <i>Rhinolophus marshalli</i> | <i>Rhinolophus</i> | Rhinolophidae | 2018 | CX | 71911444 | 59771830 |
| S18CXBatR05   | <i>Rhinolophus marshalli</i> | <i>Rhinolophus</i> | Rhinolophidae | 2018 | CX | 68241790 | 27343221 |
| S18CXBatR24   | <i>Rhinolophus marshalli</i> | <i>Rhinolophus</i> | Rhinolophidae | 2018 | CX | 1.06E+08 | 10758449 |
| S18CXBatR26   | <i>Rhinolophus marshalli</i> | <i>Rhinolophus</i> | Rhinolophidae | 2018 | CX | 1.19E+08 | 1.02E+08 |
| S18CXBatR27   | <i>Rhinolophus marshalli</i> | <i>Rhinolophus</i> | Rhinolophidae | 2018 | CX | 1.12E+08 | 18265891 |
| S18CXBatR10   | <i>Rhinolophus pusillus</i>  | <i>Rhinolophus</i> | Rhinolophidae | 2018 | CX | 63379146 | 28506295 |
| S18CXBatR21   | <i>Rhinolophus pusillus</i>  | <i>Rhinolophus</i> | Rhinolophidae | 2018 | CX | 1.03E+08 | 10741787 |
| S18CXBatR16   | <i>Rhinolophus pusillus</i>  | <i>Rhinolophus</i> | Rhinolophidae | 2018 | CX | 88419254 | 54559586 |
| S18CXBatR29   | <i>Rhinolophus pusillus</i>  | <i>Rhinolophus</i> | Rhinolophidae | 2018 | CX | 1.09E+08 | 18103956 |
| S18CXBatR20   | <i>Rhinolophus pusillus</i>  | <i>Rhinolophus</i> | Rhinolophidae | 2018 | CX | 1.67E+08 | 1.32E+08 |
| S18CXBatR09   | <i>Rhinolophus pusillus</i>  | <i>Rhinolophus</i> | Rhinolophidae | 2018 | CX | 99403952 | 47915468 |
| S18CXBatR02   | <i>Rhinolophus pusillus</i>  | <i>Rhinolophus</i> | Rhinolophidae | 2018 | CX | 67996538 | 48698414 |
| S18CXBatR15   | <i>Rhinolophus pusillus</i>  | <i>Rhinolophus</i> | Rhinolophidae | 2018 | CX | 1.31E+08 | 11192628 |
| S18CXBatR22   | <i>Rhinolophus pusillus</i>  | <i>Rhinolophus</i> | Rhinolophidae | 2018 | CX | 1.08E+08 | 42138869 |
| S18CXBatR14-2 | <i>Rhinolophus pusillus</i>  | <i>Rhinolophus</i> | Rhinolophidae | 2018 | CX | 1.07E+08 | 37667832 |
| S18CXBatR12   | <i>Rhinolophus pusillus</i>  | <i>Rhinolophus</i> | Rhinolophidae | 2018 | CX | 1.05E+08 | 40302452 |
| S18CXBatR13   | <i>Rhinolophus pusillus</i>  | <i>Rhinolophus</i> | Rhinolophidae | 2018 | CX | 1.13E+08 | 10148950 |
| S18CXBatR23   | <i>Rhinolophus pusillus</i>  | <i>Rhinolophus</i> | Rhinolophidae | 2018 | CX | 1.14E+08 | 7305986  |
| S18CXBatR25   | <i>Rhinolophus pusillus</i>  | <i>Rhinolophus</i> | Rhinolophidae | 2018 | CX | 1.14E+08 | 81392657 |
| S18CXBatR30   | <i>Rhinolophus pusillus</i>  | <i>Rhinolophus</i> | Rhinolophidae | 2018 | CX | 1.16E+08 | 6529464  |
| S18CXBatR31   | <i>Rhinolophus pusillus</i>  | <i>Rhinolophus</i> | Rhinolophidae | 2018 | CX | 1E+08    | 45270117 |
| S18CXBatR08   | <i>Rhinolophus stheno</i>    | <i>Rhinolophus</i> | Rhinolophidae | 2018 | CX | 75384154 | 16447965 |
| S18CXBatR18   | <i>Rhinolophus stheno</i>    | <i>Rhinolophus</i> | Rhinolophidae | 2018 | CX | 1.17E+08 | 88625344 |
| S18CXBatR01   | <i>Rhinolophus stheno</i>    | <i>Rhinolophus</i> | Rhinolophidae | 2018 | CX | 1.16E+08 | 93201201 |
| S18CXBatR03   | <i>Rhinolophus stheno</i>    | <i>Rhinolophus</i> | Rhinolophidae | 2018 | CX | 67604788 | 54282166 |
| S18CXBatR06   | <i>Rhinolophus stheno</i>    | <i>Rhinolophus</i> | Rhinolophidae | 2018 | CX | 80760756 | 60095676 |
| S18CXBatR28   | <i>Rhinolophus stheno</i>    | <i>Rhinolophus</i> | Rhinolophidae | 2018 | CX | 1.13E+08 | 71799955 |
| S18CXBatR17-2 | <i>Rhinolophus stheno</i>    | <i>Rhinolophus</i> | Rhinolophidae | 2018 | CX | 1.08E+08 | 38124264 |
| S18CXBatR11   | <i>Rhinolophus stheno</i>    | <i>Rhinolophus</i> | Rhinolophidae | 2018 | CX | 1.26E+08 | 19196122 |
| S15BSBatR06   | <i>Rhinolophus stheno</i>    | <i>Rhinolophus</i> | Rhinolophidae | 2015 | BS | 65314642 | 25746124 |
| S15BSBatR05   | <i>Rhinolophus stheno</i>    | <i>Rhinolophus</i> | Rhinolophidae | 2015 | BS | 65305160 | 18771296 |
| S15BSBatR01   | <i>Rhinolophus stheno</i>    | <i>Rhinolophus</i> | Rhinolophidae | 2015 | BS | 71119598 | 15944072 |
| S15BSBatR04   | <i>Rhinolophus stheno</i>    | <i>Rhinolophus</i> | Rhinolophidae | 2015 | BS | 64889926 | 24127736 |
| S17BSBatR11   | <i>Rhinolophus thomasi</i>   | <i>Rhinolophus</i> | Rhinolophidae | 2017 | BS | 65440252 | 38926950 |
| S17BSBatR13   | <i>Rhinolophus thomasi</i>   | <i>Rhinolophus</i> | Rhinolophidae | 2017 | BS | 67377824 | 46518061 |
| S17BSBatR14   | <i>Rhinolophus thomasi</i>   | <i>Rhinolophus</i> | Rhinolophidae | 2017 | BS | 65348384 | 33970555 |
| S17BSBatR01   | <i>Rhinolophus thomasi</i>   | <i>Rhinolophus</i> | Rhinolophidae | 2017 | BS | 58241216 | 39602737 |
| S17BSBatR02   | <i>Rhinolophus thomasi</i>   | <i>Rhinolophus</i> | Rhinolophidae | 2017 | BS | 66765760 | 43411641 |
| S17BSBatR12   | <i>Rhinolophus thomasi</i>   | <i>Rhinolophus</i> | Rhinolophidae | 2017 | BS | 74803632 | 28579849 |
| S17BSBatR40   | <i>Rhinolophus thomasi</i>   | <i>Rhinolophus</i> | Rhinolophidae | 2017 | BS | 73270944 | 44245627 |
| S18LSBatR77   | <i>Rhinolophus thomasi</i>   | <i>Rhinolophus</i> | Rhinolophidae | 2018 | LS | 56022704 | 30102862 |
| S18LSBatR80   | <i>Rhinolophus thomasi</i>   | <i>Rhinolophus</i> | Rhinolophidae | 2018 | LS | 44192582 | 28709370 |

|             |                                  |                    |               |      |    |          |          |
|-------------|----------------------------------|--------------------|---------------|------|----|----------|----------|
| S18LSBatR82 | <i>Rhinolophus thomasi</i>       | <i>Rhinolophus</i> | Rhinolophidae | 2018 | LS | 47203674 | 23348871 |
| S18LSBatR79 | <i>Rhinolophus thomasi</i>       | <i>Rhinolophus</i> | Rhinolophidae | 2018 | LS | 52330550 | 23436743 |
| S18LSBatR75 | <i>Rhinolophus thomasi</i>       | <i>Rhinolophus</i> | Rhinolophidae | 2018 | LS | 54469990 | 17648763 |
| S18LSBatR62 | <i>Rhinolophus thomasi</i>       | <i>Rhinolophus</i> | Rhinolophidae | 2018 | LS | 73711364 | 58724419 |
| S18LSBatR61 | <i>Rhinolophus thomasi</i>       | <i>Rhinolophus</i> | Rhinolophidae | 2018 | LS | 77023514 | 26512424 |
| S19MLBatR14 | <i>Rousettus amplexicaudatus</i> | <i>Rousettus</i>   | Pteropodidae  | 2019 | ML | 78082162 | 17863826 |
| S19MLBatR12 | <i>Rousettus amplexicaudatus</i> | <i>Rousettus</i>   | Pteropodidae  | 2019 | ML | 98127700 | 47140492 |
| S19MLBatR13 | <i>Rousettus amplexicaudatus</i> | <i>Rousettus</i>   | Pteropodidae  | 2019 | ML | 76305938 | 16738464 |
| S19MLBatR15 | <i>Rousettus amplexicaudatus</i> | <i>Rousettus</i>   | Pteropodidae  | 2019 | ML | 75387638 | 31881753 |
| S19MLBatR16 | <i>Rousettus amplexicaudatus</i> | <i>Rousettus</i>   | Pteropodidae  | 2019 | ML | 65162828 | 45542147 |
| S17WDBatR01 | <i>Rousettus leschenaultii</i>   | <i>Rousettus</i>   | Pteropodidae  | 2017 | WD | 72177110 | 51281139 |
| S17WDBatR10 | <i>Rousettus leschenaultii</i>   | <i>Rousettus</i>   | Pteropodidae  | 2017 | WD | 75110590 | 48582603 |
| S16WDBatR55 | <i>Rousettus leschenaultii</i>   | <i>Rousettus</i>   | Pteropodidae  | 2016 | WD | 78537748 | 54648732 |
| S16WDBatR59 | <i>Rousettus leschenaultii</i>   | <i>Rousettus</i>   | Pteropodidae  | 2016 | WD | 75013354 | 42808530 |
| S17WDBatR02 | <i>Rousettus leschenaultii</i>   | <i>Rousettus</i>   | Pteropodidae  | 2017 | WD | 66785654 | 45208328 |
| S18WDBatR03 | <i>Rousettus leschenaultii</i>   | <i>Rousettus</i>   | Pteropodidae  | 2018 | WD | 68894874 | 52781177 |
| S18WDBatR04 | <i>Rousettus leschenaultii</i>   | <i>Rousettus</i>   | Pteropodidae  | 2018 | WD | 75336460 | 52153071 |
| S18WDBatR05 | <i>Rousettus leschenaultii</i>   | <i>Rousettus</i>   | Pteropodidae  | 2018 | WD | 67836198 | 38900686 |
| S18WDBatR06 | <i>Rousettus leschenaultii</i>   | <i>Rousettus</i>   | Pteropodidae  | 2018 | WD | 98176992 | 63451329 |
| S18WDBatR07 | <i>Rousettus leschenaultii</i>   | <i>Rousettus</i>   | Pteropodidae  | 2018 | WD | 70884072 | 52972290 |
| S18WDBatR08 | <i>Rousettus leschenaultii</i>   | <i>Rousettus</i>   | Pteropodidae  | 2018 | WD | 64049926 | 8513037  |
| S18WDBatR09 | <i>Rousettus leschenaultii</i>   | <i>Rousettus</i>   | Pteropodidae  | 2018 | WD | 92628194 | 68038890 |
| S18WDBatR10 | <i>Rousettus leschenaultii</i>   | <i>Rousettus</i>   | Pteropodidae  | 2018 | WD | 66267308 | 49915815 |
| S17WDBatR07 | <i>Rousettus leschenaultii</i>   | <i>Rousettus</i>   | Pteropodidae  | 2017 | WD | 71526006 | 55738841 |
| S16WDBatR56 | <i>Rousettus leschenaultii</i>   | <i>Rousettus</i>   | Pteropodidae  | 2016 | WD | 68397658 | 53572725 |
| S16WDBatR57 | <i>Rousettus leschenaultii</i>   | <i>Rousettus</i>   | Pteropodidae  | 2016 | WD | 75851196 | 32004029 |
| S16WDBatR62 | <i>Rousettus leschenaultii</i>   | <i>Rousettus</i>   | Pteropodidae  | 2016 | WD | 67326708 | 57273260 |
| S16WDBatR63 | <i>Rousettus leschenaultii</i>   | <i>Rousettus</i>   | Pteropodidae  | 2016 | WD | 65393626 | 37310541 |

65

66

**Supplementary Table 2.** The 55 mammal-associated viruses identified in this study.

| virus_name_new                 | family                 | num_host_species | num_host_genus | virus_of_concern | Novel virus species | Blastx hit                          | Accession number | E value   | Identity |
|--------------------------------|------------------------|------------------|----------------|------------------|---------------------|-------------------------------------|------------------|-----------|----------|
| Bat astrovirus ZK1             | <i>Astroviridae</i>    | 1                | 1              | No               | Yes                 | Bat astrovirus                      | QVW10123.1       | 8.51E-208 | 55.1     |
| Bat astrovirus BS1             | <i>Astroviridae</i>    | 1                | 1              | No               | Yes                 | Bat astrovirus Ha/Guangxi/LS11/2007 | ACN88713.1       | 1.93E-142 | 80.9     |
| Bat astrovirus LS1             | <i>Astroviridae</i>    | 1                | 1              | No               | Yes                 | Bat astrovirus Ha/Guangxi/LS11/2007 | ACN88713.1       | 2.45E-255 | 78.4     |
| Bat anellovirus ZK1            | <i>Anelloviridae</i>   | 1                | 1              | No               | Yes                 | Torque teno felis virus             | QZE11920.1       | 5.00E-26  | 30.94    |
| Bat astrovirus ZK2             | <i>Astroviridae</i>    | 1                | 1              | No               | Yes                 | Bat astrovirus                      | QOR29562.1       | 0         | 61.81    |
| Bat astrovirus BS2             | <i>Astroviridae</i>    | 1                | 1              | No               | Yes                 | Bat astrovirus Ha/Guangxi/LS11/2007 | ACN88713.1       | 0         | 82.62    |
| Bat astrovirus BS3             | <i>Astroviridae</i>    | 1                | 1              | No               | Yes                 | Bat astrovirus Ha/Guangxi/LS11/2007 | ACN88713.1       | 0         | 81.3     |
| Bat astrovirus CX1             | <i>Astroviridae</i>    | 1                | 1              | No               | Yes                 | Bat astrovirus Ha/Guangxi/LS11/2007 | ACN88713.1       | 0         | 77.13    |
| Bat astrovirus CX2             | <i>Astroviridae</i>    | 1                | 1              | No               | Yes                 | Bat astrovirus Ha/Guangxi/LS11/2007 | ACN88713.1       | 0         | 79.55    |
| Bat bocaparvovirus ZK1         | <i>Parvoviridae</i>    | 2                | 1              | No               | Yes                 | Rhinolophus sinicus bocaparvovirus  | AOX47676.1       | 0         | 68.54    |
| Bat circovirus CX1             | <i>Circoviridae</i>    | 1                | 1              | No               | Yes                 | Bat associated circovirus 9         | YP_009508628.1   | 0         | 78.46    |
| Bat coronavirus WD2            | <i>Coronaviridae</i>   | 1                | 1              | No               | No                  | Coronavirus BtRT-BetaCoV/GX2018     | QDF43839.1       | 0         | 99.15    |
| Bat HKU10-like coronavirus BS1 | <i>Coronaviridae</i>   | 1                | 1              | No               | No                  | Hipposideros bat coronavirus HKU10  | AFU92121.1       | 0         | 98.99    |
| Bat mastadenovirus WD1         | <i>Adenoviridae</i>    | 1                | 1              | No               | Yes                 | Bat mastadenovirus B                | QDA77076.1       | 0         | 55.87    |
| Bat mastadenovirus ZK1         | <i>Adenoviridae</i>    | 1                | 1              | No               | Yes                 | Equine adenovirus 1                 | ANG08548.1       | 0         | 65.43    |
| Bat paramyxovirus WD1          | <i>Paramyxoviridae</i> | 1                | 1              | No               | Yes                 | Bat paramyxovirus                   | AIF74183.1       | 0         | 83.23    |
| Bat parvovirus CX1             | <i>Parvoviridae</i>    | 1                | 1              | No               | Yes                 | Bat parvovirus                      | QRV11697.1       | 0         | 49.52    |
| Bat parvovirus BS1             | <i>Parvoviridae</i>    | 1                | 1              | No               | Yes                 | Bat parvovirus                      | QRV11697.1       | 0         | 51.68    |
| Bat parvovirus LS1             | <i>Parvoviridae</i>    | 1                | 1              | No               | Yes                 | Bat parvovirus                      | AIF74198.1       | 0         | 78.83    |
| Bat picornavirus CX7           | <i>Picornaviridae</i>  | 1                | 1              | No               | Yes                 | Bat picornavirus 3                  | YP_004782204.1   | 0         | 55.95    |
| Bat picornavirus CX3           | <i>Picornaviridae</i>  | 1                | 1              | No               | Yes                 | Teschovirus sp.                     | ART66861.1       | 0         | 64.93    |
| Bat picornavirus WD3           | <i>Picornaviridae</i>  | 1                | 1              | No               | Yes                 | Bat picornavirus                    | AIF74257.1       | 0         | 58.21    |
| Bat picornavirus CX1           | <i>Picornaviridae</i>  | 1                | 1              | No               | Yes                 | Bat picornavirus                    | AIF74257.1       | 0         | 54.24    |
| Bat picornavirus CX4           | <i>Picornaviridae</i>  | 2                | 1              | No               | Yes                 | Canine picornavirus                 | AMX81410.1       | 0         | 67.72    |
| Bat picornavirus CX2           | <i>Picornaviridae</i>  | 2                | 1              | No               | Yes                 | Bat picornavirus CUS8               | QTE76071.1       | 0         | 54.82    |
| Bat picornavirus ZK1           | <i>Picornaviridae</i>  | 1                | 1              | No               | Yes                 | Bat picornavirus LMA6               | QTE76069.1       | 0         | 54.48    |
| Bat picornavirus CX5           | <i>Picornaviridae</i>  | 2                | 1              | No               | Yes                 | Bat picornavirus CUS8               | QTE76071.1       | 0         | 51.16    |
| Bat polyomavirus CX1           | <i>Polyomaviridae</i>  | 2                | 2              | No               | No                  | Bat polyomavirus                    | AIF74274.1       | 0         | 99.64    |



|                                    |                       |   |   |     |     |                                          |                |           |       |
|------------------------------------|-----------------------|---|---|-----|-----|------------------------------------------|----------------|-----------|-------|
| Bat RVJ-like rotavirus ZK1         | <i>Reoviridae</i>     | 1 | 1 | No  | Yes | Rotavirus J                              | YP_010086029.1 | 0         | 74.48 |
| Bat RVJ-like rotavirus CX2         | <i>Reoviridae</i>     | 1 | 1 | No  | Yes | Rotavirus J                              | YP_010086029.1 | 0         | 67.69 |
| Bat RVJ-like rotavirus LS1         | <i>Reoviridae</i>     | 1 | 1 | No  | Yes | Rotavirus J                              | YP_010086029.1 | 0         | 68.97 |
| Bat sapovirus WD1                  | <i>Caliciviridae</i>  | 1 | 1 | No  | Yes | Bat sapovirus                            | YP_009345598.1 | 0         | 40.63 |
| Bat sapovirus WD2                  | <i>Caliciviridae</i>  | 1 | 1 | No  | Yes | Bat sapovirus                            | YP_009345598.1 | 0         | 59.09 |
| Bat sapovirus WD3                  | <i>Caliciviridae</i>  | 2 | 1 | No  | Yes | Bat sapovirus                            | YP_009345598.1 | 0         | 45.22 |
| Bat SARS-like coronavirus LS1      | <i>Coronaviridae</i>  | 2 | 1 | Yes | No  | BtRs-BetaCoV/GX2013                      | AIA62319.1     | 0         | 99.47 |
| Bat SARS-like coronavirus CX1      | <i>Coronaviridae</i>  | 2 | 1 | Yes | No  | Bat SARS-like coronavirus RsSHC014       | AGZ48805.1     | 0         | 99.34 |
| Bat orthoreovirus BS1              | <i>Reoviridae</i>     | 4 | 3 | Yes | No  | Mammalian orthoreovirus                  | AXM44651.1     | 0         | 99.43 |
| Bat tupavirus BS1                  | <i>Rhabdoviridae</i>  | 1 | 1 | No  | Yes | Wufeng Rhinolophus pearsonii tupavirus 1 | UBB42393.1     | 0         | 75.6  |
| Bat tupavirus BS2                  | <i>Rhabdoviridae</i>  | 1 | 1 | No  | Yes | Wufeng Rhinolophus pearsonii tupavirus 1 | UBB42393.1     | 0         | 72.5  |
| Bat tupavirus CX1                  | <i>Rhabdoviridae</i>  | 1 | 1 | No  | Yes | Klamath virus                            | YP_009362266.1 | 4.24E-286 | 63.6  |
| Bat tupavirus CX2                  | <i>Rhabdoviridae</i>  | 1 | 1 | No  | Yes | Klamath virus                            | YP_009362266.1 | 0         | 62    |
| Bat tupavirus CX3                  | <i>Rhabdoviridae</i>  | 1 | 1 | No  | Yes | Wufeng Rhinolophus pearsonii tupavirus 1 | UBB42393.1     | 0         | 76.3  |
| Bat picornavirus WD1               | <i>Picornaviridae</i> | 1 | 1 | No  | Yes | Rhinolophus sinicus picornavirus         | AWK02666.1     | 1.13E-198 | 57.9  |
| Bat picornavirus BS1               | <i>Picornaviridae</i> | 1 | 1 | No  | Yes | Rhinolophus picornavirus                 | AWK02675.1     | 0         | 71.7  |
| Bat picornavirus BS2               | <i>Picornaviridae</i> | 1 | 1 | No  | No  | Rhinolophus sinicus picornavirus         | AWK02666.1     | 0         | 92.9  |
| Bat picornavirus CX8               | <i>Picornaviridae</i> | 1 | 1 | No  | Yes | Bat picornavirus CUS8                    | QTE76071.1     | 0         | 53.8  |
| Bat picornavirus CX9               | <i>Picornaviridae</i> | 1 | 1 | No  | Yes | Bat picornavirus                         | AIF74256.1     | 1.63E-279 | 72.2  |
| Bat picornavirus LS1               | <i>Picornaviridae</i> | 1 | 1 | No  | Yes | Rhinolophus sinicus picornavirus         | AWK02666.1     | 0         | 67.1  |
| Bat picornavirus WD2               | <i>Picornaviridae</i> | 1 | 1 | No  | Yes | Crohivirus B                             | YP_009345900.1 | 1.32E-151 | 59.8  |
| Bat HKU2-like alphacoronavirus LS1 | <i>Coronaviridae</i>  | 1 | 1 | Yes | No  | Rhinolophus bat coronavirus HKU2         | ABB77049.1     | 7.00E-140 | 99.51 |
| Bat rotavirus A type CX1           | <i>Reoviridae</i>     | 5 | 2 | Yes | No  | Simian rotavirus A strain TUCH           | B3F2X5.1       | 0         | 98.81 |
| Bat rotavirus A type WD1           | <i>Reoviridae</i>     | 1 | 1 | No  | No  | Rotavirus A                              | ARB49202.1     | 0         | 90.91 |
| Bat rotavirus A type WD2           | <i>Reoviridae</i>     | 1 | 1 | No  | No  | Rotavirus A                              | ARB49202.1     | 0         | 96.88 |
| Bat HKU9-like betacoronavirus WD1  | <i>Coronaviridae</i>  | 1 | 1 | No  | No  | Bat coronavirus HKU9-5-2                 | ADM33565.1     | 0         | 99.34 |
| Bat picornavirus CX6               | <i>Picornaviridae</i> | 1 | 1 | No  | No  | Bat picornavirus                         | AIF74257.1     | 0         | 98.46 |

70 **Supplementary Table 3.** Viral genome coverage and read depth statistics. "reference\_length"  
 71 column refers to the genome size of the most closely related reference genome, and  
 72 "coverage\_ref" is percentage coverage relative to that reference genome.

| lib_id      | virus_name                     | RPM     | numreads | covbases | meandepth | reference_length | coverage_ref |
|-------------|--------------------------------|---------|----------|----------|-----------|------------------|--------------|
| S15ZKBatR30 | Bat anellovirus ZK1            | 4.44    | 163      | 1064     | 21.48     | 2367             | 45.00%       |
| S17BSBatR05 | Bat astrovirus BS1             | 4.97    | 132      | 1340     | 11.10     | 6813             | 19.70%       |
| S17BSBatR03 | Bat astrovirus BS1             | 1.09    | 51       | 961      | 4.37      | 6813             | 14.10%       |
| S17BSBatR05 | Bat astrovirus BS2             | 5.79    | 105      | 1114     | 12.67     | 6813             | 16.40%       |
| S17BSBatR05 | Bat astrovirus BS3             | 11.91   | 196      | 1998     | 13.92     | 6813             | 29.30%       |
| S18CXBatR30 | Bat astrovirus CX1             | 251.93  | 1668     | 3900     | 62.45     | 6813             | 57.20%       |
| S18CXBatR30 | Bat astrovirus CX2             | 122.67  | 813      | 2446     | 48.51     | 6813             | 35.90%       |
| S18LSBatR73 | Bat astrovirus LS1             | 8.14    | 130      | 1279     | 14.91     | 6813             | 18.80%       |
| S15ZKBatR30 | Bat astrovirus ZK1             | 10.18   | 361      | 2703     | 19.15     | 6813             | 39.70%       |
| S15ZKBatR29 | Bat astrovirus ZK2             | 174.96  | 12639    | 6529     | 276.22    | 6813             | 95.80%       |
| S15ZKBatR22 | Bat astrovirus ZK2             | 7.72    | 473      | 6400     | 10.12     | 6813             | 93.90%       |
| S15ZKBatR21 | Bat astrovirus ZK2             | 2.33    | 147      | 5398     | 3.10      | 6813             | 79.20%       |
| S15ZKBatR30 | Bat astrovirus ZK2             | 4.89    | 176      | 4113     | 3.81      | 6813             | 60.40%       |
| S15ZKBatR27 | Bat astrovirus ZK2             | 1.30    | 88       | 3237     | 1.92      | 6813             | 47.50%       |
| S15ZKBatR24 | Bat bocaparvovirus ZK1         | 307.22  | 11621    | 2322     | 668.95    | 4880             | 47.60%       |
| S18LSBatR56 | Bat bocaparvovirus ZK1         | 61.48   | 966      | 1976     | 49.91     | 4880             | 40.50%       |
| S15ZKBatR22 | Bat bocaparvovirus ZK1         | 11.95   | 285      | 1960     | 16.17     | 4880             | 40.20%       |
| S18LSBatR57 | Bat bocaparvovirus ZK1         | 1.09    | 22       | 1007     | 1.28      | 4880             | 20.60%       |
| S18CXBatR22 | Bat circovirus CX1             | 13.17   | 593      | 1816     | 46.63     | 1816             | 100.00%      |
| S17BSBatR02 | Bat HKU10-like coronavirus BS1 | 51.16   | 2859     | 6364     | 60.35     | 28494            | 22.30%       |
| S17BSBatR11 | Bat HKU10-like coronavirus BS1 | 5.09    | 246      | 5965     | 5.26      | 28494            | 20.90%       |
| S18LSBatR79 | Bat HKU10-like coronavirus BS1 | 10.24   | 310      | 5738     | 6.74      | 28494            | 20.10%       |
| S17BSBatR12 | Bat HKU10-like coronavirus BS1 | 2.27    | 74       | 4171     | 1.58      | 28494            | 14.60%       |
| S18CXBatR09 | Bat HKU10-like coronavirus BS1 | 1.52    | 167      | 4160     | 3.49      | 28494            | 14.60%       |
| S18CXBatR13 | Bat HKU2-like coronavirus LS1  | 1.58    | 18       | 855      | 0.84      | 27165            | 3.10%        |
| S17WDBatR02 | Bat HKU9-like coronavirus WD1  | 12.08   | 590      | 19849    | 2.86      | 29114            | 68.20%       |
| S17WDBatR07 | Bat HKU9-like coronavirus WD1  | 3.64    | 210      | 12728    | 1.02      | 29114            | 43.70%       |
| S18WDBatR05 | Bat HKU9-like coronavirus WD1  | 1.03    | 40       | 2032     | 0.19      | 29114            | 7.00%        |
| S16WDBatR58 | Bat coronavirus WD2            | 2156.74 | 86662    | 30208    | 402.15    | 29114            | 100.00%      |
| S17WDBatR03 | Bat mastadenovirus WD1         | 5.79    | 240      | 2681     | 12.63     | 29812            | 9.00%        |
| S15ZKBatR21 | Bat mastadenovirus ZK1         | 219.60  | 13097    | 13159    | 139.74    | 29812            | 44.10%       |
| S15ZKBatR13 | Bat mastadenovirus ZK1         | 35.74   | 1273     | 12620    | 12.69     | 29812            | 42.30%       |
| S15ZKBatR25 | Bat mastadenovirus ZK1         | 3.19    | 204      | 8841     | 2.11      | 29812            | 29.70%       |
| S17BSBatR47 | Bat orthoreovirus BS1          | 2318.13 | 78857    | 23245    | 510.76    | 23200            | 100.00%      |
| S17BSBatR04 | Bat orthoreovirus BS1          | 17.71   | 924      | 21513    | 5.75      | 23200            | 92.70%       |

|               |                         |          |        |       |         |       |         |
|---------------|-------------------------|----------|--------|-------|---------|-------|---------|
| S17BSBatR42   | Bat orthoreovirus BS1   | 946.40   | 32078  | 20191 | 225.21  | 23200 | 87.00%  |
| S18LSBatR59   | Bat orthoreovirus BS1   | 44.62    | 3183   | 15785 | 21.64   | 23200 | 68.00%  |
| S18LSBatR58   | Bat orthoreovirus BS1   | 2.35     | 189    | 9478  | 1.49    | 23200 | 40.90%  |
| S18CXBatR01   | Bat orthoreovirus BS1   | 1.31     | 146    | 9042  | 1.19    | 23200 | 39.00%  |
| S18CXBatR11   | Bat orthoreovirus BS1   | 1.41     | 38     | 1610  | 0.51    | 23200 | 6.90%   |
| S15ZKBatR11   | Bat orthoreovirus BS1   | 2.15     | 32     | 1190  | 0.39    | 23200 | 5.10%   |
| S16WDBatR58   | Bat pararubulavirus WD1 | 3.49     | 135    | 1315  | 14.54   | 15888 | 8.30%   |
| S17BSBatR14   | Bat parvovirus BS1      | 5.62     | 187    | 1967  | 13.38   | 5065  | 38.80%  |
| S18CXBatR17-2 | Bat parvovirus CX1      | 18.33    | 719    | 3531  | 29.67   | 5065  | 69.70%  |
| S18LSBatR61   | Bat parvovirus LS1      | 2.68     | 73     | 1012  | 10.06   | 5065  | 20.00%  |
| S17BSBatR05   | Bat picornavirus BS1    | 27.19    | 431    | 2922  | 20.88   | 7600  | 38.40%  |
| S17BSBatR11   | Bat picornavirus BS2    | 3.19     | 127    | 2369  | 7.65    | 7600  | 31.20%  |
| S18LSBatR79   | Bat picornavirus BS2    | 1.02     | 54     | 1624  | 3.26    | 7600  | 21.40%  |
| S18CXBatR05   | Bat picornavirus CX1    | 161.50   | 4443   | 7750  | 81.64   | 7600  | 100.00% |
| S18CXBatR07   | Bat picornavirus CX1    | 235.69   | 2673   | 7750  | 49.28   | 7600  | 100.00% |
| S18CXBatR24   | Bat picornavirus CX2    | 278.85   | 4304   | 6878  | 91.56   | 7600  | 90.50%  |
| S18CXBatR07   | Bat picornavirus CX2    | 42.49    | 720    | 6414  | 14.89   | 7600  | 84.40%  |
| S18CXBatR17-2 | Bat picornavirus CX2    | 4.77     | 378    | 3809  | 7.66    | 7600  | 50.10%  |
| S18CXBatR27   | Bat picornavirus CX2    | 2.85     | 70     | 3166  | 1.48    | 7600  | 41.70%  |
| S18CXBatR14-2 | Bat picornavirus CX3    | 48.48    | 1851   | 6850  | 39.30   | 7600  | 90.10%  |
| S18CXBatR25   | Bat picornavirus CX4    | 19.40    | 1586   | 7253  | 31.99   | 7600  | 95.40%  |
| S18CXBatR30   | Bat picornavirus CX4    | 87.14    | 579    | 6831  | 11.64   | 7600  | 89.90%  |
| S18CXBatR09   | Bat picornavirus CX5    | 54.28    | 2596   | 6915  | 53.20   | 7600  | 91.00%  |
| S18CXBatR21   | Bat picornavirus CX5    | 9.96     | 110    | 3719  | 2.32    | 7600  | 48.90%  |
| S18CXBatR30   | Bat picornavirus CX6    | 36333.15 | 238682 | 7829  | 4448.89 | 7600  | 100.00% |
| S18CXBatR08   | Bat picornavirus CX7    | 1387.89  | 22863  | 7715  | 422.18  | 7600  | 100.00% |
| S18CXBatR11   | Bat picornavirus CX7    | 329.13   | 6363   | 7715  | 120.53  | 7600  | 100.00% |
| S18CXBatR17-2 | Bat picornavirus CX7    | 18.31    | 707    | 7449  | 13.32   | 7600  | 98.00%  |
| S18CXBatR28   | Bat picornavirus CX7    | 2.28     | 166    | 5112  | 3.15    | 7600  | 67.30%  |
| S18CXBatR17-2 | Bat picornavirus CX8    | 43.23    | 2850   | 6683  | 61.92   | 7600  | 87.90%  |
| S18CXBatR17-2 | Bat picornavirus CX9    | 2.83     | 109    | 1588  | 9.99    | 7600  | 20.90%  |
| S18LSBatR78   | Bat picornavirus LS1    | 176.93   | 1324   | 7025  | 27.40   | 7600  | 92.40%  |
| S16WDBatR60   | Bat picornavirus WD1    | 9.32     | 357    | 1621  | 31.41   | 7600  | 21.30%  |
| S18WDBatR02   | Bat picornavirus WD2    | 2.07     | 64     | 1159  | 7.87    | 7600  | 15.30%  |
| S17WDBatR07   | Bat picornavirus WD3    | 1.99     | 111    | 1540  | 9.18    | 7600  | 20.30%  |
| S15ZKBatR30   | Bat picornavirus ZK1    | 349.97   | 12405  | 6914  | 256.03  | 7600  | 91.00%  |
| S15ZKBatR13   | Bat picornavirus ZK1    | 20.92    | 716    | 6877  | 14.59   | 7600  | 90.50%  |
| S19MLBatR11   | Bat picornavirus ZK1    | 26.49    | 1703   | 6075  | 34.10   | 7600  | 79.90%  |
| S15ZKBatR22   | Bat picornavirus ZK1    | 1.28     | 78     | 3055  | 1.62    | 7600  | 40.20%  |

|               |                            |           |         |       |          |       |         |
|---------------|----------------------------|-----------|---------|-------|----------|-------|---------|
| S18CXBatR14-2 | Bat polyomavirus CX1       | 24.95     | 966     | 5129  | 27.23    | 5129  | 100.00% |
| S15BSBatR04   | Bat polyomavirus CX1       | 5.64      | 143     | 4430  | 3.92     | 5129  | 86.40%  |
| S18CXBatR24   | Bat rotavirus A type CX1   | 802895.75 | 8833939 | 18249 | 68532.61 | 18600 | 98.10%  |
| S17BSBatR49   | Bat rotavirus A type CX1   | 13602.16  | 750959  | 17877 | 5812.30  | 18600 | 96.10%  |
| S17BSBatR35   | Bat rotavirus A type CX1   | 4666.13   | 361226  | 17763 | 2745.89  | 18600 | 95.50%  |
| S17BSBatR16   | Bat rotavirus A type CX1   | 321.30    | 13738   | 17534 | 105.40   | 18600 | 94.30%  |
| S17BSBatR37   | Bat rotavirus A type CX1   | 66.35     | 3639    | 16510 | 29.21    | 18600 | 88.80%  |
| S17BSBatR36   | Bat rotavirus A type CX1   | 39.22     | 2723    | 16017 | 20.98    | 18600 | 86.10%  |
| S18LSBatR79   | Bat rotavirus A type CX1   | 74.41     | 3101    | 15878 | 28.12    | 18600 | 85.40%  |
| S18LSBatR78   | Bat rotavirus A type CX1   | 39.62     | 690     | 14001 | 5.42     | 18600 | 75.30%  |
| S17BSBatR41   | Bat rotavirus A type CX1   | 12.37     | 930     | 13840 | 7.28     | 18600 | 74.40%  |
| S18CXBatR23   | Bat rotavirus A type CX1   | 36.27     | 277     | 10620 | 2.15     | 18600 | 57.10%  |
| S17BSBatR07   | Bat rotavirus A type CX1   | 5.72      | 247     | 8737  | 1.81     | 18600 | 47.00%  |
| S17BSBatR48   | Bat rotavirus A type CX1   | 3.36      | 126     | 6798  | 1.12     | 18600 | 36.50%  |
| S17BSBatR12   | Bat rotavirus A type CX1   | 1.19      | 39      | 3469  | 0.60     | 18600 | 18.70%  |
| S18CXBatR21   | Bat rotavirus A type CX1   | 3.17      | 34      | 2818  | 0.42     | 18600 | 15.20%  |
| S18CXBatR30   | Bat rotavirus A type CX1   | 4.29      | 28      | 1876  | 0.44     | 18600 | 10.10%  |
| S18CXBatR29   | Bat rotavirus A type CX1   | 1.22      | 22      | 946   | 0.66     | 18600 | 5.10%   |
| S18CXBatR30   | Bat RVJ-like rotavirus CX2 | 1214.49   | 7986    | 18293 | 65.89    | 18600 | 98.30%  |
| S18CXBatR21   | Bat RVJ-like rotavirus CX2 | 23.09     | 266     | 9445  | 2.12     | 18600 | 50.80%  |
| S18CXBatR10   | Bat RVJ-like rotavirus CX2 | 7.93      | 246     | 9217  | 2.41     | 18600 | 49.60%  |
| S18CXBatR16   | Bat RVJ-like rotavirus CX2 | 2.05      | 118     | 7241  | 1.05     | 18600 | 38.90%  |
| S18CXBatR13   | Bat RVJ-like rotavirus CX2 | 3.25      | 46      | 3289  | 0.45     | 18600 | 17.70%  |
| S18CXBatR23   | Bat RVJ-like rotavirus CX2 | 6.84      | 54      | 2999  | 0.71     | 18600 | 16.10%  |
| S18LSBatR79   | Bat RVJ-like rotavirus LS1 | 683.03    | 16351   | 18067 | 148.44   | 18600 | 97.10%  |
| S18LSBatR80   | Bat RVJ-like rotavirus LS1 | 15.12     | 442     | 13687 | 4.41     | 18600 | 73.60%  |
| S18LSBatR82   | Bat RVJ-like rotavirus LS1 | 4.11      | 98      | 5793  | 1.13     | 18600 | 31.10%  |
| S17BSBatR12   | Bat RVJ-like rotavirus LS1 | 3.18      | 125     | 5423  | 1.25     | 18600 | 29.20%  |
| S17BSBatR11   | Bat RVJ-like rotavirus LS1 | 1.95      | 101     | 4315  | 1.40     | 18600 | 23.20%  |
| S18LSBatR75   | Bat RVJ-like rotavirus LS1 | 1.59      | 34      | 2519  | 0.37     | 18600 | 13.50%  |
| S16WDBatR61   | Bat rotavirus A type WD1   | 271.72    | 9699    | 17944 | 62.93    | 18600 | 96.50%  |
| S18WDBatR02   | Bat rotavirus A type WD1   | 16.70     | 578     | 13517 | 4.64     | 18600 | 72.70%  |
| S17WDBatR01   | Bat rotavirus A type WD2   | 2.22      | 118     | 7017  | 1.03     | 18600 | 37.70%  |
| S16WDBatR62   | Bat rotavirus A type WD2   | 1.89      | 116     | 6752  | 1.25     | 18600 | 36.30%  |
| S18WDBatR05   | Bat rotavirus A type WD2   | 2.78      | 108     | 6513  | 0.92     | 18600 | 35.00%  |
| S18WDBatR08   | Bat rotavirus A type WD2   | 8.46      | 80      | 5258  | 0.59     | 18600 | 28.30%  |
| S15ZKBatR13   | Bat RVJ-like rotavirus ZK1 | 261.75    | 8957    | 17939 | 74.54    | 18600 | 96.40%  |
| S18LSBatR73   | Bat RVJ-like rotavirus ZK1 | 47.61     | 793     | 16788 | 6.38     | 18600 | 90.30%  |
| S15ZKBatR11   | Bat RVJ-like rotavirus ZK1 | 47.17     | 574     | 15208 | 5.49     | 18600 | 81.80%  |

|             |                               |          |        |       |         |       |         |
|-------------|-------------------------------|----------|--------|-------|---------|-------|---------|
| S15ZKBatR27 | Bat RVJ-like rotavirus ZK1    | 3.25     | 208    | 10751 | 1.75    | 18600 | 57.80%  |
| S15ZKBatR30 | Bat RVJ-like rotavirus ZK1    | 1.13     | 40     | 1852  | 0.80    | 18600 | 10.00%  |
| S16WDBatR58 | Bat sapovirus WD1             | 55.41    | 2123   | 7212  | 41.84   | 7696  | 93.70%  |
| S17WDBatR10 | Bat sapovirus WD2             | 178.40   | 8704   | 7394  | 167.20  | 7696  | 96.10%  |
| S18WDBatR05 | Bat sapovirus WD3             | 18.30    | 715    | 6734  | 14.74   | 7696  | 87.50%  |
| S18WDBatR08 | Bat sapovirus WD3             | 4.35     | 38     | 1489  | 0.79    | 7696  | 19.30%  |
| S18CXBatR24 | Bat SARS-like coronavirus CX1 | 32.53    | 357    | 13488 | 1.74    | 29903 | 45.10%  |
| S18CXBatR29 | Bat SARS-like coronavirus CX1 | 14.91    | 272    | 11110 | 1.33    | 29903 | 37.20%  |
| S18LSBatR79 | Bat SARS-like coronavirus LS1 | 776.17   | 18255  | 29756 | 89.32   | 29751 | 100.00% |
| S18LSBatR61 | Bat SARS-like coronavirus LS1 | 2.00     | 54     | 4107  | 0.26    | 29751 | 13.80%  |
| S18LSBatR73 | Bat SARS-like coronavirus LS1 | 0.88     | 18     | 1915  | 0.09    | 29751 | 6.40%   |
| S15BSBatR05 | Bat tupavirus BS1             | 32559.39 | 612185 | 12187 | 7179.72 | 11440 | 100.00% |
| S15BSBatR06 | Bat tupavirus BS1             | 2.02     | 52     | 2178  | 0.61    | 11440 | 19.00%  |
| S17BSBatR16 | Bat tupavirus BS2             | 2408.63  | 82448  | 11950 | 984.36  | 11440 | 100.00% |
| S18CXBatR13 | Bat tupavirus CX1             | 130.75   | 1334   | 5069  | 38.58   | 11440 | 44.30%  |
| S18CXBatR16 | Bat tupavirus CX1             | 1.21     | 66     | 2725  | 1.91    | 11440 | 23.80%  |
| S18CXBatR13 | Bat tupavirus CX2             | 155.19   | 1580   | 4377  | 52.92   | 11440 | 38.30%  |
| S18CXBatR16 | Bat tupavirus CX2             | 1.06     | 58     | 2520  | 1.93    | 11440 | 22.00%  |
| S18CXBatR21 | Bat tupavirus CX3             | 145.79   | 1581   | 6276  | 36.76   | 11440 | 54.90%  |
| S18CXBatR09 | Bat tupavirus CX3             | 7.93     | 377    | 5679  | 8.52    | 11440 | 49.60%  |
| S18CXBatR23 | Bat tupavirus CX3             | 18.75    | 138    | 4688  | 3.20    | 11440 | 41.00%  |

73

74

75 **Supplementary Table 4.** Partial Mantel tests showing the effect of host phylogenetic distance,  
 76 geographic distance and time interval on mammal-associated virome similarity. P values are  
 77 two-sided and are obtained from 1000 permutations. The precision of permutational P values  
 78 is 0.001 using 1000 permutations, so the precise values for  $P < 0.001$  are not shown.

| Variable              | Coefficient of correlation | P value |
|-----------------------|----------------------------|---------|
| Phylogenetic distance | 0.275                      | <0.001  |
| Geographic distance   | 0.078                      | 0.011   |
| Time interval         | 0.085                      | 0.007   |

79 **Supplementary Table 5.** Partial Mantel tests showing the effect of host phylogenetic distance,  
 80 geographic distance and time interval on total virome similarity. P values are two-sided and are  
 81 obtained from 1000 permutations. The precision of permutational P values is 0.001 using 1000  
 82 permutations, so the precise values for  $P < 0.001$  are not shown.

| Variable                                                          | Coefficient of correlation | P value |
|-------------------------------------------------------------------|----------------------------|---------|
| <b>Total virome (RNA viruses only) *</b>                          |                            |         |
| Phylogenetic distance                                             | 0.424                      | <0.001  |
| Geographic distance                                               | 0.353                      | <0.001  |
| Time interval                                                     | 0.231                      | <0.001  |
| <b>Total virome (grouped by viral Order, DNA and RNA viruses)</b> |                            |         |
| Phylogenetic distance                                             | 0.330                      | <0.001  |
| Geographic distance                                               | -0.084                     | 0.995   |
| Time interval                                                     | 0.160                      | <0.001  |

83 \*Total virome includes all RNA virus species detected, and this analysis was performed based at the species  
 84 level. Another analysis was performed by grouping viral species according to their viral order, which include  
 85 both RNA and DNA viruses. Grouping viruses by order can increase robustness, especially for DNA  
 86 bacteriophage, as their genome sizes are often very large, of which meta-transcriptomics can only recover a  
 87 small portion.
