# Supplementary material for: Individual bat virome analysis reveals co-infection and spillover among bats and virus zoonotic potential
Source: PubMed Central journal article supplement (PMC10333379; doi:10.1038/s41467-023-39835-1), 2023-07-10
Supplement: 41467_2023_39835_MOESM3_ESM.pdf [file 41467_2023_39835_MOESM3_ESM.pdf]

## **Description of Additional Supplementary Files**

File Name: Supplementary Data 1

Description: Primers used in this study.
